# Supplementary material
Source: MDPI journal article supplement (https://www.mdpi.com/2079-9276/2/4/581)
Supplement: s1 [file s1]

Archive with 4 entries (4 files):
- resources-39372-Supplementary.pdf
- SuppMat_S2.txt
- SuppMat_S2.xml
- SuppMat_S5.txt
