# Supplementary material
Source: MDPI journal article supplement (https://www.mdpi.com/2079-9276/2/4/581)
Supplement: s1 [file s1 › SuppMat_S2.txt]

Name	Category	Sub-Category	Unit	WI 2013 BETA, Material intensity, abiotic, GLO w/ localisation, kg
Energy, gross calorific value, in biomass	resource	biotic	MJ	0
Energy, gross calorific value, in biomass, primary forest	resource	biotic	MJ	0
Peat, in ground	resource	biotic	kg	0
Wood, hard, standing	resource	biotic	m3	0
Wood, primary forest, standing	resource	biotic	m3	0
Wood, soft, standing	resource	biotic	m3	0
Wood, unspecified, standing	resource	biotic	m3	0
Carbon dioxide, in air	resource	in air	kg	0
Energy, kinetic (in wind), converted	resource	in air	MJ	0
Energy, solar, converted	resource	in air	MJ	0
Krypton, in air	resource	in air	kg	0
Xenon, in air	resource	in air	kg	0
Aluminium, 24% in bauxite, 11% in crude ore, in ground	resource	in ground	kg	8.541666667
Anhydrite, in ground	resource	in ground	kg	1.072
Barite, 15% in crude ore, in ground	resource	in ground	kg	10.66666667
Basalt, in ground	resource	in ground	kg	1.01
Borax, in ground	resource	in ground	kg	1.1
Cadmium, 0.30% in sulfide, Cd 0.18%, Pb, Zn, Ag, In, in ground	resource	in ground	kg	1
Calcite, in ground	resource	in ground	kg	1
Carbon, in organic matter, in soil	resource	in ground	kg	0
Cerium, 24% in bastnasite, 2.4% in crude ore, in ground	resource	in ground	kg	41.66666667
Chromium, 25.5% in chromite, 11.6% in crude ore, in ground	resource	in ground	kg	18.87931034
Chrysotile, in ground	resource	in ground	kg	1
Cinnabar, in ground	resource	in ground	kg	1
Clay, bentonite, in ground	resource	in ground	kg	1
Clay, unspecified, in ground	resource	in ground	kg	2.3042
Coal, brown, in ground	resource	in ground	kg	4.2
Coal, hard, unspecified, in ground	resource	in ground	kg	5.282
Cobalt, in ground	resource	in ground	kg	1
Colemanite, in ground	resource	in ground	kg	1
Copper, 0.52% in sulfide, Cu 0.27% and Mo 8.2E-3% in crude ore, in ground	resource	in ground	kg	419.1229331
Copper, 0.59% in sulfide, Cu 0.22% and Mo 8.2E-3% in crude ore, in ground	resource	in ground	kg	963.6283961
Copper, 0.97% in sulfide, Cu 0.36% and Mo 4.1E-2% in crude ore, in ground	resource	in ground	kg	508.2294264
Copper, 0.99% in sulfide, Cu 0.36% and Mo 8.2E-3% in crude ore, in ground	resource	in ground	kg	553.5035307
Copper, 1.13% in sulfide, Cu 0.76% and Ni 0.76% in crude ore, in ground	resource	in ground	kg	134.0789474
Copper, 1.18% in sulfide, Cu 0.39% and Mo 8.2E-3% in crude ore, in ground	resource	in ground	kg	551.9839277
Copper, 1.42% in sulfide, Cu 0.81% and Mo 8.2E-3% in crude ore, in ground	resource	in ground	kg	134.4414569
Copper, 2.19% in sulfide, Cu 1.83% and Mo 8.2E-3% in crude ore, in ground	resource	in ground	kg	102.709172
Copper, Cu 0.38%, Au 9.7E-4%, Ag 9.7E-4%, Zn 0.63%, Pb 0.014%, in ore, in ground	resource	in ground	kg	292.4147611
Cu, Cu 3.2E+0%, Pt 2.5E-4%, Pd 7.3E-4%, Rh 2.0E-5%, Ni 2.3E+0% in ore, in ground	resource	in ground	kg	19.81094346
Cu, Cu 5.2E-2%, Pt 4.8E-4%, Pd 2.0E-4%, Rh 2.4E-5%, Ni 3.7E-2% in ore, in ground	resource	in ground	kg	1396.147329
Diatomite, in ground	resource	in ground	kg	1.1
Dolomite, in ground	resource	in ground	kg	1.01
Energy, geothermal, converted	resource	in ground	MJ	0
Europium, 0.06% in bastnasite, 0.006% in crude ore, in ground	resource	in ground	kg	16666.66667
Feldspar, in ground	resource	in ground	kg	1.067
Fluorine, 4.5% in apatite, 1% in crude ore, in ground	resource	in ground	kg	100
Fluorine, 4.5% in apatite, 3% in crude ore, in ground	resource	in ground	kg	33.33333333
Fluorspar, 92%, in ground	resource	in ground	kg	1.385869565
Gadolinium, 0.15% in bastnasite, 0.015% in crude ore, in ground	resource	in ground	kg	6666.666667
Gallium, 0.014% in bauxite, in ground	resource	in ground	kg	1
Gas, mine, off-gas, process, coal mining	resource	in ground	Nm3	0.75
Gas, natural, in ground	resource	in ground	Nm3	0.8535
Gold, Au 1.1E-4%, Ag 4.2E-3%, in ore, in ground	resource	in ground	kg	71461.71694
Gold, Au 1.3E-4%, Ag 4.6E-5%, in ore, in ground	resource	in ground	kg	1750000
Gold, Au 1.4E-4%, in ore, in ground	resource	in ground	kg	2200000
Gold, Au 2.1E-4%, Ag 2.1E-4%, in ore, in ground	resource	in ground	kg	733333.3333
Gold, Au 4.3E-4%, in ore, in ground	resource	in ground	kg	716279.0698
Gold, Au 4.9E-5%, in ore, in ground	resource	in ground	kg	6285714.286
Gold, Au 6.7E-4%, in ore, in ground	resource	in ground	kg	459701.4925
Gold, Au 7.1E-4%, in ore, in ground	resource	in ground	kg	433802.8169
Gold, Au 9.7E-4%, Ag 9.7E-4%, Zn 0.63%, Cu 0.38%, Pb 0.014%, in ore, in ground	resource	in ground	kg	292.4147611
Granite, in ground	resource	in ground	kg	1.01
Gravel, in ground	resource	in ground	kg	1.01
Gypsum, in ground	resource	in ground	kg	1.0396
Helium, 0.08% in natural gas, in ground	resource	in ground	kg	1
Indium, 0.005% in sulfide, In 0.003%, Pb, Zn, Ag, Cd, in ground	resource	in ground	kg	1
Iron, 46% in ore, 25% in crude ore, in ground	resource	in ground	kg	7.528
Kaolinite, 24% in crude ore, in ground	resource	in ground	kg	6.308333333
Kieserite, 25% in crude ore, in ground	resource	in ground	kg	4
Lanthanum, 7.2% in bastnasite, 0.72% in crude ore, in ground	resource	in ground	kg	138.8888889
Lead, 5.0% in sulfide, Pb 3.0%, Zn, Ag, Cd, In, in ground	resource	in ground	kg	40.33333333
Lead, Pb 0.014%, Au 9.7E-4%, Ag 9.7E-4%, Zn 0.63%, Cu 0.38%, in ore, in ground	resource	in ground	kg	117.9406203
Lithium, 0.15% in brine, in ground	resource	in ground	kg	666.6666667
Magnesite, 60% in crude ore, in ground	resource	in ground	kg	1.666666667
Manganese, 35.7% in sedimentary deposit, 14.2% in crude ore, in ground	resource	in ground	kg	17.76760563
Metamorphous rock, graphite containing, in ground	resource	in ground	kg	1
Molybdenum, 0.010% in sulfide, Mo 8.2E-3% and Cu 1.83% in crude ore, in ground	resource	in ground	kg	102.709172
Molybdenum, 0.014% in sulfide, Mo 8.2E-3% and Cu 0.81% in crude ore, in ground	resource	in ground	kg	134.4414569
Molybdenum, 0.016% in sulfide, Mo 8.2E-3% and Cu 0.27% in crude ore, in ground	resource	in ground	kg	419.1229331
Molybdenum, 0.022% in sulfide, Mo 8.2E-3% and Cu 0.22% in crude ore, in ground	resource	in ground	kg	963.6283961
Molybdenum, 0.022% in sulfide, Mo 8.2E-3% and Cu 0.36% in crude ore, in ground	resource	in ground	kg	553.5035307
Molybdenum, 0.025% in sulfide, Mo 8.2E-3% and Cu 0.39% in crude ore, in ground	resource	in ground	kg	314.5153189
Molybdenum, 0.11% in sulfide, Mo 4.1E-2% and Cu 0.36% in crude ore, in ground	resource	in ground	kg	508.2294264
Neodymium, 4% in bastnasite, 0.4% in crude ore, in ground	resource	in ground	kg	250
Ni, Ni 2.3E+0%, Pt 2.5E-4%, Pd 7.3E-4%, Rh 2.0E-5%, Cu 3.2E+0% in ore, in ground	resource	in ground	kg	29.55826213
Ni, Ni 3.7E-2%, Pt 4.8E-4%, Pd 2.0E-4%, Rh 2.4E-5%, Cu 5.2E-2% in ore, in ground	resource	in ground	kg	1974.270936
Nickel, 1.13% in sulfide, Ni 0.76% and Cu 0.76% in crude ore, in ground	resource	in ground	kg	105.1973684
Nickel, 1.98% in silicates, 1.04% in crude ore, in ground	resource	in ground	kg	153.75
Oil, crude, in ground	resource	in ground	kg	1.22
Olivine, in ground	resource	in ground	kg	1
Pd, Pd 2.0E-4%, Pt 4.8E-4%, Rh 2.4E-5%, Ni 3.7E-2%, Cu 5.2E-2% in ore, in ground	resource	in ground	kg	1974.270936
Pd, Pd 7.3E-4%, Pt 2.5E-4%, Rh 2.0E-5%, Ni 2.3E+0%, Cu 3.2E+0% in ore, in ground	resource	in ground	kg	29.55826213
Perlite, in ground	resource	in ground	kg	1
Phosphorus, 18% in apatite, 12% in crude ore, in ground	resource	in ground	kg	36.66666667
Phosphorus, 18% in apatite, 4% in crude ore, in ground	resource	in ground	kg	110
Praseodymium, 0.42% in bastnasite, 0.042% in crude ore, in ground	resource	in ground	kg	2380.952381
Pt, Pt 2.5E-4%, Pd 7.3E-4%, Rh 2.0E-5%, Ni 2.3E+0%, Cu 3.2E+0% in ore, in ground	resource	in ground	kg	29.55826213
Pt, Pt 4.8E-4%, Pd 2.0E-4%, Rh 2.4E-5%, Ni 3.7E-2%, Cu 5.2E-2% in ore, in ground	resource	in ground	kg	1226.255239
Pumice, in ground	resource	in ground	kg	1
Pyrite, in ground	resource	in ground	kg	1
Pyrolusite, in ground	resource	in ground	kg	1
Rh, Rh 2.0E-5%, Pt 2.5E-4%, Pd 7.3E-4%, Ni 2.3E+0%, Cu 3.2E+0% in ore, in ground	resource	in ground	kg	29.55826213
Rh, Rh 2.4E-5%, Pt 4.8E-4%, Pd 2.0E-4%, Ni 3.7E-2%, Cu 5.2E-2% in ore, in ground	resource	in ground	kg	1226.255239
Rhenium, in crude ore, in ground	resource	in ground	kg	1
Samarium, 0.3% in bastnasite, 0.03% in crude ore, in ground	resource	in ground	kg	3333.333333
Sand, unspecified, in ground	resource	in ground	kg	1.013045
Shale, in ground	resource	in ground	kg	1
Silver, 0.007% in sulfide, Ag 0.004%, Pb, Zn, Cd, In, in ground	resource	in ground	kg	1.702
Silver, 0.01% in crude ore, in ground	resource	in ground	kg	17020
Silver, 3.2ppm in sulfide, Ag 1.2ppm, Cu and Te, in crude ore, in ground	resource	in ground	kg	1.702
Silver, Ag 2.1E-4%, Au 2.1E-4%, in ore, in ground	resource	in ground	kg	4052.380952
Silver, Ag 4.2E-3%, Au 1.1E-4%, in ore, in ground	resource	in ground	kg	52204.17633
Silver, Ag 4.6E-5%, Au 1.3E-4%, in ore, in ground	resource	in ground	kg	1278409.091
Silver, Ag 9.7E-4%, Au 9.7E-4%, Zn 0.63%, Cu 0.38%, Pb 0.014%, in ore, in ground	resource	in ground	kg	219.3110708
Sodium chloride, in ground	resource	in ground	kg	1
Sodium nitrate, in ground	resource	in ground	kg	1
Sodium sulphate, various forms, in ground	resource	in ground	kg	1
Spodumene, in ground	resource	in ground	kg	1
Stibnite, in ground	resource	in ground	kg	1
Sulfur, in ground	resource	in ground	kg	1
Sylvite, 25 % in sylvinite, in ground	resource	in ground	kg	4
Talc, in ground	resource	in ground	kg	1.1
Tantalum, 81.9% in tantalite, 1.6E-4% in crude ore, in ground	resource	in ground	kg	1
Tellurium, 0.5ppm in sulfide, Te 0.2ppm, Cu and Ag, in crude ore, in ground	resource	in ground	kg	1
Tin, 79% in cassiterite, 0.1% in crude ore, in ground	resource	in ground	kg	1210
TiO2, 54% in ilmenite, 2.6% in crude ore, in ground	resource	in ground	kg	46.53846154
TiO2, 95% in rutile, 0.40% in crude ore, in ground	resource	in ground	kg	302.5
Ulexite, in ground	resource	in ground	kg	1
Uranium, in ground	resource	in ground	kg	17000
Vermiculite, in ground	resource	in ground	kg	1
Volume occupied, final repository for low-active radioactive waste	resource	in ground	m3	0
Volume occupied, final repository for radioactive waste	resource	in ground	m3	0
Volume occupied, underground deposit	resource	in ground	m3	0
Zinc, 9.0% in sulfide, Zn 5.3%, Pb, Ag, Cd, In, in ground	resource	in ground	kg	1.21
Zinc, Zn 0.63%, Au 9.7E-4%, Ag 9.7E-4%, Cu 0.38%, Pb 0.014%, in ore, in ground	resource	in ground	kg	117.9406203
Zirconia, as baddeleyite, in ground	resource	in ground	kg	1
Zirconium, 50% in zircon, 0.39% in crude ore, in ground	resource	in ground	kg	256.4102564
Bromine, 0.0023% in water	resource	in water	kg	0
Energy, potential (in hydropower reservoir), converted	resource	in water	MJ	0
Iodine, 0.03% in water	resource	in water	kg	0
Magnesium, 0.13% in water	resource	in water	kg	0
Volume occupied, reservoir	resource	in water	m3a	0
Water, cooling, unspecified natural origin	resource	in water	m3	0
Water, lake	resource	in water	m3	0
Water, river	resource	in water	m3	0
Water, salt, ocean	resource	in water	m3	0
Water, salt, sole	resource	in water	m3	0
Water, turbine use, unspecified natural origin	resource	in water	m3	0
Water, unspecified natural origin	resource	in water	m3	0
Water, well, in ground	resource	in water	m3	0
Occupation, arable	resource	land	m2a	0
Occupation, arable, non-irrigated	resource	land	m2a	0
Occupation, arable, non-irrigated, diverse-intensive	resource	land	m2a	0
Occupation, arable, non-irrigated, fallow	resource	land	m2a	0
Occupation, arable, non-irrigated, monotone-intensive	resource	land	m2a	0
Occupation, construction site	resource	land	m2a	0
Occupation, dump site	resource	land	m2a	0
Occupation, dump site, benthos	resource	land	m2a	0
Occupation, forest	resource	land	m2a	0
Occupation, forest, extensive	resource	land	m2a	0
Occupation, forest, intensive	resource	land	m2a	0
Occupation, forest, intensive, clear-cutting	resource	land	m2a	0
Occupation, forest, intensive, normal	resource	land	m2a	0
Occupation, forest, intensive, short-cycle	resource	land	m2a	0
Occupation, heterogeneous, agricultural	resource	land	m2a	0
Occupation, industrial area	resource	land	m2a	0
Occupation, industrial area, benthos	resource	land	m2a	0
Occupation, industrial area, built up	resource	land	m2a	0
Occupation, industrial area, vegetation	resource	land	m2a	0
Occupation, mineral extraction site	resource	land	m2a	0
Occupation, pasture and meadow	resource	land	m2a	0
Occupation, pasture and meadow, extensive	resource	land	m2a	0
Occupation, pasture and meadow, intensive	resource	land	m2a	0
Occupation, permanent crop	resource	land	m2a	0
Occupation, permanent crop, fruit	resource	land	m2a	0
Occupation, permanent crop, fruit, extensive	resource	land	m2a	0
Occupation, permanent crop, fruit, intensive	resource	land	m2a	0
Occupation, permanent crop, vine	resource	land	m2a	0
Occupation, permanent crop, vine, extensive	resource	land	m2a	0
Occupation, permanent crop, vine, intensive	resource	land	m2a	0
Occupation, sea and ocean	resource	land	m2a	0
Occupation, shrub land, sclerophyllous	resource	land	m2a	0
Occupation, traffic area, rail embankment	resource	land	m2a	0
Occupation, traffic area, rail network	resource	land	m2a	0
Occupation, traffic area, road embankment	resource	land	m2a	0
Occupation, traffic area, road network	resource	land	m2a	0
Occupation, tropical rain forest	resource	land	m2a	0
Occupation, unknown	resource	land	m2a	0
Occupation, urban, continuously built	resource	land	m2a	0
Occupation, urban, discontinuously built	resource	land	m2a	0
Occupation, water bodies, artificial	resource	land	m2a	0
Occupation, water courses, artificial	resource	land	m2a	0
Transformation, from arable	resource	land	m2	0
Transformation, from arable, non-irrigated	resource	land	m2	0
Transformation, from arable, non-irrigated, diverse-intensive	resource	land	m2	0
Transformation, from arable, non-irrigated, fallow	resource	land	m2	0
Transformation, from arable, non-irrigated, monotone-intensive	resource	land	m2	0
Transformation, from dump site	resource	land	m2	0
Transformation, from dump site, benthos	resource	land	m2	0
Transformation, from dump site, inert material landfill	resource	land	m2	0
Transformation, from dump site, residual material landfill	resource	land	m2	0
Transformation, from dump site, sanitary landfill	resource	land	m2	0
Transformation, from dump site, slag compartment	resource	land	m2	0
Transformation, from forest	resource	land	m2	0
Transformation, from forest, extensive	resource	land	m2	0
Transformation, from forest, intensive	resource	land	m2	0
Transformation, from forest, intensive, clear-cutting	resource	land	m2	0
Transformation, from forest, intensive, normal	resource	land	m2	0
Transformation, from forest, intensive, short-cycle	resource	land	m2	0
Transformation, from heterogeneous, agricultural	resource	land	m2	0
Transformation, from industrial area	resource	land	m2	0
Transformation, from industrial area, benthos	resource	land	m2	0
Transformation, from industrial area, built up	resource	land	m2	0
Transformation, from industrial area, vegetation	resource	land	m2	0
Transformation, from mineral extraction site	resource	land	m2	0
Transformation, from pasture and meadow	resource	land	m2	0
Transformation, from pasture and meadow, extensive	resource	land	m2	0
Transformation, from pasture and meadow, intensive	resource	land	m2	0
Transformation, from permanent crop	resource	land	m2	0
Transformation, from permanent crop, fruit	resource	land	m2	0
Transformation, from permanent crop, fruit, extensive	resource	land	m2	0
Transformation, from permanent crop, fruit, intensive	resource	land	m2	0
Transformation, from permanent crop, vine	resource	land	m2	0
Transformation, from permanent crop, vine, extensive	resource	land	m2	0
Transformation, from permanent crop, vine, intensive	resource	land	m2	0
Transformation, from sea and ocean	resource	land	m2	0
Transformation, from shrub land, sclerophyllous	resource	land	m2	0
Transformation, from traffic area, rail embankment	resource	land	m2	0
Transformation, from traffic area, rail network	resource	land	m2	0
Transformation, from traffic area, road embankment	resource	land	m2	0
Transformation, from traffic area, road network	resource	land	m2	0
Transformation, from tropical rain forest	resource	land	m2	0
Transformation, from unknown	resource	land	m2	0
Transformation, from urban, continuously built	resource	land	m2	0
Transformation, from urban, discontinuously built	resource	land	m2	0
Transformation, from water bodies, artificial	resource	land	m2	0
Transformation, from water courses, artificial	resource	land	m2	0
Transformation, to arable	resource	land	m2	0
Transformation, to arable, non-irrigated	resource	land	m2	0
Transformation, to arable, non-irrigated, diverse-intensive	resource	land	m2	0
Transformation, to arable, non-irrigated, fallow	resource	land	m2	0
Transformation, to arable, non-irrigated, monotone-intensive	resource	land	m2	0
Transformation, to dump site	resource	land	m2	0
Transformation, to dump site, benthos	resource	land	m2	0
Transformation, to dump site, inert material landfill	resource	land	m2	0
Transformation, to dump site, residual material landfill	resource	land	m2	0
Transformation, to dump site, sanitary landfill	resource	land	m2	0
Transformation, to dump site, slag compartment	resource	land	m2	0
Transformation, to forest	resource	land	m2	0
Transformation, to forest, extensive	resource	land	m2	0
Transformation, to forest, intensive	resource	land	m2	0
Transformation, to forest, intensive, clear-cutting	resource	land	m2	0
Transformation, to forest, intensive, normal	resource	land	m2	0
Transformation, to forest, intensive, short-cycle	resource	land	m2	0
Transformation, to heterogeneous, agricultural	resource	land	m2	0
Transformation, to industrial area	resource	land	m2	0
Transformation, to industrial area, benthos	resource	land	m2	0
Transformation, to industrial area, built up	resource	land	m2	0
Transformation, to industrial area, vegetation	resource	land	m2	0
Transformation, to mineral extraction site	resource	land	m2	0
Transformation, to pasture and meadow	resource	land	m2	0
Transformation, to pasture and meadow, extensive	resource	land	m2	0
Transformation, to pasture and meadow, intensive	resource	land	m2	0
Transformation, to permanent crop	resource	land	m2	0
Transformation, to permanent crop, fruit	resource	land	m2	0
Transformation, to permanent crop, fruit, extensive	resource	land	m2	0
Transformation, to permanent crop, fruit, intensive	resource	land	m2	0
Transformation, to permanent crop, vine	resource	land	m2	0
Transformation, to permanent crop, vine, extensive	resource	land	m2	0
Transformation, to permanent crop, vine, intensive	resource	land	m2	0
Transformation, to sea and ocean	resource	land	m2	0
Transformation, to shrub land, sclerophyllous	resource	land	m2	0
Transformation, to traffic area, rail embankment	resource	land	m2	0
Transformation, to traffic area, rail network	resource	land	m2	0
Transformation, to traffic area, road embankment	resource	land	m2	0
Transformation, to traffic area, road network	resource	land	m2	0
Transformation, to tropical rain forest	resource	land	m2	0
Transformation, to unknown	resource	land	m2	0
Transformation, to urban, continuously built	resource	land	m2	0
Transformation, to urban, discontinuously built	resource	land	m2	0
Transformation, to water bodies, artificial	resource	land	m2	0
Transformation, to water courses, artificial	resource	land	m2	0
