# Supplementary material
Source: MDPI journal article supplement (https://www.mdpi.com/2079-9276/2/4/581)
Supplement: s1 [file s1 › SuppMat_S2.xml]

<?xml version="1.0" encoding="UTF-8"?>
<ecoSpold xsi:schemaLocation="http://www.EcoInvent.org/EcoSpold01Impact C:\Programme\ecoinvent\EcoSpold\EcoSpold01ImpactDataset.xsd" xmlns:xsi="http://www.w3.org/2001/XMLSchema-instance" xmlns="http://www.EcoInvent.org/EcoSpold01Impact">
	<dataset validCompanyCodes="CompanyCodes.xml" validRegionalCodes="RegionalCodes.xml" validCategories="Categories.xml" validUnits="Units.xml" number="1" generator="EcoInvent Excel2EcoSpold 1.2.1" timestamp="2013-07-29T16:46:32" internalSchemaVersion="1.0">
		<metaInformation>
			<processInformation>
				<referenceFunction datasetRelatesToProduct="false" name="material intensity, abiotic" localName="Materialintensitaet, abiotisch" infrastructureProcess="false" amount="1" unit="kg" category="WI 2013 BETA" subCategory="material intensity" localCategory="WI 2013 BETA" localSubCategory="Materialintensitaet" generalComment="Implementation of used and unused extraction factors to assess material intensities of elementary flows." infrastructureIncluded="true">
					<synonym>MI abiotic</synonym>
				</referenceFunction>
				<geography location="GLO w/ localisation"></geography>
				<timePeriod dataValidForEntirePeriod="true">
					<startYear>2013</startYear>
					<endYear>2013</endYear>
				</timePeriod>
				<dataSetInformation timestamp="2013-07-29T16:46:32" type="4" impactAssessmentResult="false" version="BETA" internalVersion="1.0" energyValues="0" languageCode="en" localLanguageCode="de"></dataSetInformation>
			</processInformation>
			<modellingAndValidation>
				<source number="222" sourceType="0" firstAuthor="Wuppertal Institut" year="2003" title="Material intensity of materials, fuels, transport services - Version 2; 28.10.2003" placeOfPublications="Wuppertal, DE" publisher="Wuppertal Institut"></source>
				<source number="333" sourceType="0" firstAuthor="Wuppertal Institut" additionalAuthors="SERI, GWS" year="2008" title="INDI-LINK: Indicator-based evaluation of interlinkages between different sustainable development objectives. Report of workpackage 1.2 Calculation of indicators: Comparing coefficient and input-output approach to calculate Total Material Consumption (TMC)" placeOfPublications="Wuppertal, DE" publisher="Wuppertal Institut"></source>
			</modellingAndValidation>
			<administrativeInformation>
				<dataEntryBy person="111" qualityNetwork="1"></dataEntryBy>
				<dataGeneratorAndPublication person="111" dataPublishedIn="1" referenceToPublishedSource="222" copyright="true" accessRestrictedTo="0"></dataGeneratorAndPublication>
				<person number="111" name="Mathieu Saurat" address="Döppersberg 19, 42103 Wuppertal" telephone="0049 202 2492 132" telefax="0049 202 2492 138" email="mathieu.saurat@wupperinst.org" companyCode="WI" countryCode="DE"></person>
			</administrativeInformation>
		</metaInformation>
		<flowData>
			<exchange number="1" category="resource" subCategory="in ground" infrastructureProcess="false" name="Aluminium, 24% in bauxite, 11% in crude ore, in ground" location="" unit="kg" meanValue="8.54" uncertaintyType="0"></exchange>
			<exchange number="2" category="resource" subCategory="in ground" infrastructureProcess="false" name="Anhydrite, in ground" location="" unit="kg" meanValue="1.07" uncertaintyType="0"></exchange>
			<exchange number="3" category="resource" subCategory="in ground" infrastructureProcess="false" name="Barite, 15% in crude ore, in ground" location="" unit="kg" meanValue="10.7" uncertaintyType="0"></exchange>
			<exchange number="4" category="resource" subCategory="in ground" infrastructureProcess="false" name="Basalt, in ground" location="" unit="kg" meanValue="1.01" uncertaintyType="0"></exchange>
			<exchange number="5" category="resource" subCategory="in ground" infrastructureProcess="false" name="Borax, in ground" location="" unit="kg" meanValue="1.1" uncertaintyType="0"></exchange>
			<exchange number="6" category="resource" subCategory="in ground" infrastructureProcess="false" name="Cadmium, 0.30% in sulfide, Cd 0.18%, Pb, Zn, Ag, In, in ground" location="" unit="kg" meanValue="1" uncertaintyType="0"></exchange>
			<exchange number="7" category="resource" subCategory="in ground" infrastructureProcess="false" name="Calcite, in ground" location="" unit="kg" meanValue="1" uncertaintyType="0"></exchange>
			<exchange number="8" category="resource" subCategory="in ground" infrastructureProcess="false" name="Cerium, 24% in bastnasite, 2.4% in crude ore, in ground" location="" unit="kg" meanValue="41.7" uncertaintyType="0"></exchange>
			<exchange number="9" category="resource" subCategory="in ground" infrastructureProcess="false" name="Chromium, 25.5% in chromite, 11.6% in crude ore, in ground" location="" unit="kg" meanValue="18.9" uncertaintyType="0"></exchange>
			<exchange number="10" category="resource" subCategory="in ground" infrastructureProcess="false" name="Chrysotile, in ground" location="" unit="kg" meanValue="1" uncertaintyType="0"></exchange>
			<exchange number="11" category="resource" subCategory="in ground" infrastructureProcess="false" name="Cinnabar, in ground" location="" unit="kg" meanValue="1" uncertaintyType="0"></exchange>
			<exchange number="12" category="resource" subCategory="in ground" infrastructureProcess="false" name="Clay, bentonite, in ground" location="" unit="kg" meanValue="1" uncertaintyType="0"></exchange>
			<exchange number="13" category="resource" subCategory="in ground" infrastructureProcess="false" name="Clay, unspecified, in ground" location="" unit="kg" meanValue="2.3" uncertaintyType="0"></exchange>
			<exchange number="14" category="resource" subCategory="in ground" infrastructureProcess="false" name="Coal, brown, in ground" location="" unit="kg" meanValue="4.2" uncertaintyType="0"></exchange>
			<exchange number="15" category="resource" subCategory="in ground" infrastructureProcess="false" name="Coal, hard, unspecified, in ground" location="" unit="kg" meanValue="5.28" uncertaintyType="0"></exchange>
			<exchange number="16" category="resource" subCategory="in ground" infrastructureProcess="false" name="Cobalt, in ground" location="" unit="kg" meanValue="1" uncertaintyType="0"></exchange>
			<exchange number="17" category="resource" subCategory="in ground" infrastructureProcess="false" name="Colemanite, in ground" location="" unit="kg" meanValue="1" uncertaintyType="0"></exchange>
			<exchange number="18" category="resource" subCategory="in ground" infrastructureProcess="false" name="Copper, 0.52% in sulfide, Cu 0.27% and Mo 8.2E-3% in crude ore, in ground" location="" unit="kg" meanValue="419" uncertaintyType="0"></exchange>
			<exchange number="19" category="resource" subCategory="in ground" infrastructureProcess="false" name="Copper, 0.59% in sulfide, Cu 0.22% and Mo 8.2E-3% in crude ore, in ground" location="" unit="kg" meanValue="964" uncertaintyType="0"></exchange>
			<exchange number="20" category="resource" subCategory="in ground" infrastructureProcess="false" name="Copper, 0.97% in sulfide, Cu 0.36% and Mo 4.1E-2% in crude ore, in ground" location="" unit="kg" meanValue="508" uncertaintyType="0"></exchange>
			<exchange number="21" category="resource" subCategory="in ground" infrastructureProcess="false" name="Copper, 0.99% in sulfide, Cu 0.36% and Mo 8.2E-3% in crude ore, in ground" location="" unit="kg" meanValue="554" uncertaintyType="0"></exchange>
			<exchange number="22" category="resource" subCategory="in ground" infrastructureProcess="false" name="Copper, 1.13% in sulfide, Cu 0.76% and Ni 0.76% in crude ore, in ground" location="" unit="kg" meanValue="134" uncertaintyType="0"></exchange>
			<exchange number="23" category="resource" subCategory="in ground" infrastructureProcess="false" name="Copper, 1.18% in sulfide, Cu 0.39% and Mo 8.2E-3% in crude ore, in ground" location="" unit="kg" meanValue="552" uncertaintyType="0"></exchange>
			<exchange number="24" category="resource" subCategory="in ground" infrastructureProcess="false" name="Copper, 1.42% in sulfide, Cu 0.81% and Mo 8.2E-3% in crude ore, in ground" location="" unit="kg" meanValue="134" uncertaintyType="0"></exchange>
			<exchange number="25" category="resource" subCategory="in ground" infrastructureProcess="false" name="Copper, 2.19% in sulfide, Cu 1.83% and Mo 8.2E-3% in crude ore, in ground" location="" unit="kg" meanValue="103" uncertaintyType="0"></exchange>
			<exchange number="26" category="resource" subCategory="in ground" infrastructureProcess="false" name="Copper, Cu 0.38%, Au 9.7E-4%, Ag 9.7E-4%, Zn 0.63%, Pb 0.014%, in ore, in ground" location="" unit="kg" meanValue="292" uncertaintyType="0"></exchange>
			<exchange number="27" category="resource" subCategory="in ground" infrastructureProcess="false" name="Cu, Cu 3.2E+0%, Pt 2.5E-4%, Pd 7.3E-4%, Rh 2.0E-5%, Ni 2.3E+0% in ore, in ground" location="" unit="kg" meanValue="19.8" uncertaintyType="0"></exchange>
			<exchange number="28" category="resource" subCategory="in ground" infrastructureProcess="false" name="Cu, Cu 5.2E-2%, Pt 4.8E-4%, Pd 2.0E-4%, Rh 2.4E-5%, Ni 3.7E-2% in ore, in ground" location="" unit="kg" meanValue="1.4E3" uncertaintyType="0"></exchange>
			<exchange number="29" category="resource" subCategory="in ground" infrastructureProcess="false" name="Diatomite, in ground" location="" unit="kg" meanValue="1.1" uncertaintyType="0"></exchange>
			<exchange number="30" category="resource" subCategory="in ground" infrastructureProcess="false" name="Dolomite, in ground" location="" unit="kg" meanValue="1.01" uncertaintyType="0"></exchange>
			<exchange number="31" category="resource" subCategory="in ground" infrastructureProcess="false" name="Europium, 0.06% in bastnasite, 0.006% in crude ore, in ground" location="" unit="kg" meanValue="1.67E4" uncertaintyType="0"></exchange>
			<exchange number="32" category="resource" subCategory="in ground" infrastructureProcess="false" name="Feldspar, in ground" location="" unit="kg" meanValue="1.07" uncertaintyType="0"></exchange>
			<exchange number="33" category="resource" subCategory="in ground" infrastructureProcess="false" name="Fluorine, 4.5% in apatite, 1% in crude ore, in ground" location="" unit="kg" meanValue="100" uncertaintyType="0"></exchange>
			<exchange number="34" category="resource" subCategory="in ground" infrastructureProcess="false" name="Fluorine, 4.5% in apatite, 3% in crude ore, in ground" location="" unit="kg" meanValue="33.3" uncertaintyType="0"></exchange>
			<exchange number="35" category="resource" subCategory="in ground" infrastructureProcess="false" name="Fluorspar, 92%, in ground" location="" unit="kg" meanValue="1.39" uncertaintyType="0"></exchange>
			<exchange number="36" category="resource" subCategory="in ground" infrastructureProcess="false" name="Gadolinium, 0.15% in bastnasite, 0.015% in crude ore, in ground" location="" unit="kg" meanValue="6.67E3" uncertaintyType="0"></exchange>
			<exchange number="37" category="resource" subCategory="in ground" infrastructureProcess="false" name="Gallium, 0.014% in bauxite, in ground" location="" unit="kg" meanValue="1" uncertaintyType="0"></exchange>
			<exchange number="38" category="resource" subCategory="in ground" infrastructureProcess="false" name="Gas, mine, off-gas, process, coal mining" location="" unit="Nm3" meanValue="0.75" uncertaintyType="0"></exchange>
			<exchange number="39" category="resource" subCategory="in ground" infrastructureProcess="false" name="Gas, natural, in ground" location="" unit="Nm3" meanValue="0.854" uncertaintyType="0"></exchange>
			<exchange number="40" category="resource" subCategory="in ground" infrastructureProcess="false" name="Gold, Au 1.1E-4%, Ag 4.2E-3%, in ore, in ground" location="" unit="kg" meanValue="7.15E4" uncertaintyType="0"></exchange>
			<exchange number="41" category="resource" subCategory="in ground" infrastructureProcess="false" name="Gold, Au 1.3E-4%, Ag 4.6E-5%, in ore, in ground" location="" unit="kg" meanValue="1.75E6" uncertaintyType="0"></exchange>
			<exchange number="42" category="resource" subCategory="in ground" infrastructureProcess="false" name="Gold, Au 1.4E-4%, in ore, in ground" location="" unit="kg" meanValue="2.2E6" uncertaintyType="0"></exchange>
			<exchange number="43" category="resource" subCategory="in ground" infrastructureProcess="false" name="Gold, Au 2.1E-4%, Ag 2.1E-4%, in ore, in ground" location="" unit="kg" meanValue="7.33E5" uncertaintyType="0"></exchange>
			<exchange number="44" category="resource" subCategory="in ground" infrastructureProcess="false" name="Gold, Au 4.3E-4%, in ore, in ground" location="" unit="kg" meanValue="7.16E5" uncertaintyType="0"></exchange>
			<exchange number="45" category="resource" subCategory="in ground" infrastructureProcess="false" name="Gold, Au 4.9E-5%, in ore, in ground" location="" unit="kg" meanValue="6.29E6" uncertaintyType="0"></exchange>
			<exchange number="46" category="resource" subCategory="in ground" infrastructureProcess="false" name="Gold, Au 6.7E-4%, in ore, in ground" location="" unit="kg" meanValue="4.6E5" uncertaintyType="0"></exchange>
			<exchange number="47" category="resource" subCategory="in ground" infrastructureProcess="false" name="Gold, Au 7.1E-4%, in ore, in ground" location="" unit="kg" meanValue="4.34E5" uncertaintyType="0"></exchange>
			<exchange number="48" category="resource" subCategory="in ground" infrastructureProcess="false" name="Gold, Au 9.7E-4%, Ag 9.7E-4%, Zn 0.63%, Cu 0.38%, Pb 0.014%, in ore, in ground" location="" unit="kg" meanValue="292" uncertaintyType="0"></exchange>
			<exchange number="49" category="resource" subCategory="in ground" infrastructureProcess="false" name="Granite, in ground" location="" unit="kg" meanValue="1.01" uncertaintyType="0"></exchange>
			<exchange number="50" category="resource" subCategory="in ground" infrastructureProcess="false" name="Gravel, in ground" location="" unit="kg" meanValue="1.01" uncertaintyType="0"></exchange>
			<exchange number="51" category="resource" subCategory="in ground" infrastructureProcess="false" name="Gypsum, in ground" location="" unit="kg" meanValue="1.04" uncertaintyType="0"></exchange>
			<exchange number="52" category="resource" subCategory="in ground" infrastructureProcess="false" name="Helium, 0.08% in natural gas, in ground" location="" unit="kg" meanValue="1" uncertaintyType="0"></exchange>
			<exchange number="53" category="resource" subCategory="in ground" infrastructureProcess="false" name="Indium, 0.005% in sulfide, In 0.003%, Pb, Zn, Ag, Cd, in ground" location="" unit="kg" meanValue="1" uncertaintyType="0"></exchange>
			<exchange number="54" category="resource" subCategory="in ground" infrastructureProcess="false" name="Iron, 46% in ore, 25% in crude ore, in ground" location="" unit="kg" meanValue="7.53" uncertaintyType="0"></exchange>
			<exchange number="55" category="resource" subCategory="in ground" infrastructureProcess="false" name="Kaolinite, 24% in crude ore, in ground" location="" unit="kg" meanValue="6.31" uncertaintyType="0"></exchange>
			<exchange number="56" category="resource" subCategory="in ground" infrastructureProcess="false" name="Kieserite, 25% in crude ore, in ground" location="" unit="kg" meanValue="4" uncertaintyType="0"></exchange>
			<exchange number="57" category="resource" subCategory="in ground" infrastructureProcess="false" name="Lanthanum, 7.2% in bastnasite, 0.72% in crude ore, in ground" location="" unit="kg" meanValue="139" uncertaintyType="0"></exchange>
			<exchange number="58" category="resource" subCategory="in ground" infrastructureProcess="false" name="Lead, 5.0% in sulfide, Pb 3.0%, Zn, Ag, Cd, In, in ground" location="" unit="kg" meanValue="40.3" uncertaintyType="0"></exchange>
			<exchange number="59" category="resource" subCategory="in ground" infrastructureProcess="false" name="Lead, Pb 0.014%, Au 9.7E-4%, Ag 9.7E-4%, Zn 0.63%, Cu 0.38%, in ore, in ground" location="" unit="kg" meanValue="118" uncertaintyType="0"></exchange>
			<exchange number="60" category="resource" subCategory="in ground" infrastructureProcess="false" name="Lithium, 0.15% in brine, in ground" location="" unit="kg" meanValue="667" uncertaintyType="0"></exchange>
			<exchange number="61" category="resource" subCategory="in ground" infrastructureProcess="false" name="Magnesite, 60% in crude ore, in ground" location="" unit="kg" meanValue="1.67" uncertaintyType="0"></exchange>
			<exchange number="62" category="resource" subCategory="in ground" infrastructureProcess="false" name="Manganese, 35.7% in sedimentary deposit, 14.2% in crude ore, in ground" location="" unit="kg" meanValue="17.8" uncertaintyType="0"></exchange>
			<exchange number="63" category="resource" subCategory="in ground" infrastructureProcess="false" name="Metamorphous rock, graphite containing, in ground" location="" unit="kg" meanValue="1" uncertaintyType="0"></exchange>
			<exchange number="64" category="resource" subCategory="in ground" infrastructureProcess="false" name="Molybdenum, 0.010% in sulfide, Mo 8.2E-3% and Cu 1.83% in crude ore, in ground" location="" unit="kg" meanValue="103" uncertaintyType="0"></exchange>
			<exchange number="65" category="resource" subCategory="in ground" infrastructureProcess="false" name="Molybdenum, 0.014% in sulfide, Mo 8.2E-3% and Cu 0.81% in crude ore, in ground" location="" unit="kg" meanValue="134" uncertaintyType="0"></exchange>
			<exchange number="66" category="resource" subCategory="in ground" infrastructureProcess="false" name="Molybdenum, 0.016% in sulfide, Mo 8.2E-3% and Cu 0.27% in crude ore, in ground" location="" unit="kg" meanValue="419" uncertaintyType="0"></exchange>
			<exchange number="67" category="resource" subCategory="in ground" infrastructureProcess="false" name="Molybdenum, 0.022% in sulfide, Mo 8.2E-3% and Cu 0.22% in crude ore, in ground" location="" unit="kg" meanValue="964" uncertaintyType="0"></exchange>
			<exchange number="68" category="resource" subCategory="in ground" infrastructureProcess="false" name="Molybdenum, 0.022% in sulfide, Mo 8.2E-3% and Cu 0.36% in crude ore, in ground" location="" unit="kg" meanValue="554" uncertaintyType="0"></exchange>
			<exchange number="69" category="resource" subCategory="in ground" infrastructureProcess="false" name="Molybdenum, 0.025% in sulfide, Mo 8.2E-3% and Cu 0.39% in crude ore, in ground" location="" unit="kg" meanValue="315" uncertaintyType="0"></exchange>
			<exchange number="70" category="resource" subCategory="in ground" infrastructureProcess="false" name="Molybdenum, 0.11% in sulfide, Mo 4.1E-2% and Cu 0.36% in crude ore, in ground" location="" unit="kg" meanValue="508" uncertaintyType="0"></exchange>
			<exchange number="71" category="resource" subCategory="in ground" infrastructureProcess="false" name="Neodymium, 4% in bastnasite, 0.4% in crude ore, in ground" location="" unit="kg" meanValue="250" uncertaintyType="0"></exchange>
			<exchange number="72" category="resource" subCategory="in ground" infrastructureProcess="false" name="Ni, Ni 2.3E+0%, Pt 2.5E-4%, Pd 7.3E-4%, Rh 2.0E-5%, Cu 3.2E+0% in ore, in ground" location="" unit="kg" meanValue="29.6" uncertaintyType="0"></exchange>
			<exchange number="73" category="resource" subCategory="in ground" infrastructureProcess="false" name="Ni, Ni 3.7E-2%, Pt 4.8E-4%, Pd 2.0E-4%, Rh 2.4E-5%, Cu 5.2E-2% in ore, in ground" location="" unit="kg" meanValue="1.97E3" uncertaintyType="0"></exchange>
			<exchange number="74" category="resource" subCategory="in ground" infrastructureProcess="false" name="Nickel, 1.13% in sulfide, Ni 0.76% and Cu 0.76% in crude ore, in ground" location="" unit="kg" meanValue="105" uncertaintyType="0"></exchange>
			<exchange number="75" category="resource" subCategory="in ground" infrastructureProcess="false" name="Nickel, 1.98% in silicates, 1.04% in crude ore, in ground" location="" unit="kg" meanValue="154" uncertaintyType="0"></exchange>
			<exchange number="76" category="resource" subCategory="in ground" infrastructureProcess="false" name="Oil, crude, in ground" location="" unit="kg" meanValue="1.22" uncertaintyType="0"></exchange>
			<exchange number="77" category="resource" subCategory="in ground" infrastructureProcess="false" name="Olivine, in ground" location="" unit="kg" meanValue="1" uncertaintyType="0"></exchange>
			<exchange number="78" category="resource" subCategory="in ground" infrastructureProcess="false" name="Pd, Pd 2.0E-4%, Pt 4.8E-4%, Rh 2.4E-5%, Ni 3.7E-2%, Cu 5.2E-2% in ore, in ground" location="" unit="kg" meanValue="1.97E3" uncertaintyType="0"></exchange>
			<exchange number="79" category="resource" subCategory="in ground" infrastructureProcess="false" name="Pd, Pd 7.3E-4%, Pt 2.5E-4%, Rh 2.0E-5%, Ni 2.3E+0%, Cu 3.2E+0% in ore, in ground" location="" unit="kg" meanValue="29.6" uncertaintyType="0"></exchange>
			<exchange number="80" category="resource" subCategory="in ground" infrastructureProcess="false" name="Perlite, in ground" location="" unit="kg" meanValue="1" uncertaintyType="0"></exchange>
			<exchange number="81" category="resource" subCategory="in ground" infrastructureProcess="false" name="Phosphorus, 18% in apatite, 12% in crude ore, in ground" location="" unit="kg" meanValue="36.7" uncertaintyType="0"></exchange>
			<exchange number="82" category="resource" subCategory="in ground" infrastructureProcess="false" name="Phosphorus, 18% in apatite, 4% in crude ore, in ground" location="" unit="kg" meanValue="110" uncertaintyType="0"></exchange>
			<exchange number="83" category="resource" subCategory="in ground" infrastructureProcess="false" name="Praseodymium, 0.42% in bastnasite, 0.042% in crude ore, in ground" location="" unit="kg" meanValue="2.38E3" uncertaintyType="0"></exchange>
			<exchange number="84" category="resource" subCategory="in ground" infrastructureProcess="false" name="Pt, Pt 2.5E-4%, Pd 7.3E-4%, Rh 2.0E-5%, Ni 2.3E+0%, Cu 3.2E+0% in ore, in ground" location="" unit="kg" meanValue="29.6" uncertaintyType="0"></exchange>
			<exchange number="85" category="resource" subCategory="in ground" infrastructureProcess="false" name="Pt, Pt 4.8E-4%, Pd 2.0E-4%, Rh 2.4E-5%, Ni 3.7E-2%, Cu 5.2E-2% in ore, in ground" location="" unit="kg" meanValue="1.23E3" uncertaintyType="0"></exchange>
			<exchange number="86" category="resource" subCategory="in ground" infrastructureProcess="false" name="Pumice, in ground" location="" unit="kg" meanValue="1" uncertaintyType="0"></exchange>
			<exchange number="87" category="resource" subCategory="in ground" infrastructureProcess="false" name="Pyrite, in ground" location="" unit="kg" meanValue="1" uncertaintyType="0"></exchange>
			<exchange number="88" category="resource" subCategory="in ground" infrastructureProcess="false" name="Pyrolusite, in ground" location="" unit="kg" meanValue="1" uncertaintyType="0"></exchange>
			<exchange number="89" category="resource" subCategory="in ground" infrastructureProcess="false" name="Rh, Rh 2.0E-5%, Pt 2.5E-4%, Pd 7.3E-4%, Ni 2.3E+0%, Cu 3.2E+0% in ore, in ground" location="" unit="kg" meanValue="29.6" uncertaintyType="0"></exchange>
			<exchange number="90" category="resource" subCategory="in ground" infrastructureProcess="false" name="Rh, Rh 2.4E-5%, Pt 4.8E-4%, Pd 2.0E-4%, Ni 3.7E-2%, Cu 5.2E-2% in ore, in ground" location="" unit="kg" meanValue="1.23E3" uncertaintyType="0"></exchange>
			<exchange number="91" category="resource" subCategory="in ground" infrastructureProcess="false" name="Rhenium, in crude ore, in ground" location="" unit="kg" meanValue="1" uncertaintyType="0"></exchange>
			<exchange number="92" category="resource" subCategory="in ground" infrastructureProcess="false" name="Samarium, 0.3% in bastnasite, 0.03% in crude ore, in ground" location="" unit="kg" meanValue="3.33E3" uncertaintyType="0"></exchange>
			<exchange number="93" category="resource" subCategory="in ground" infrastructureProcess="false" name="Sand, unspecified, in ground" location="" unit="kg" meanValue="1.01" uncertaintyType="0"></exchange>
			<exchange number="94" category="resource" subCategory="in ground" infrastructureProcess="false" name="Shale, in ground" location="" unit="kg" meanValue="1" uncertaintyType="0"></exchange>
			<exchange number="95" category="resource" subCategory="in ground" infrastructureProcess="false" name="Silver, 0.007% in sulfide, Ag 0.004%, Pb, Zn, Cd, In, in ground" location="" unit="kg" meanValue="1.7" uncertaintyType="0"></exchange>
			<exchange number="96" category="resource" subCategory="in ground" infrastructureProcess="false" name="Silver, 0.01% in crude ore, in ground" location="" unit="kg" meanValue="1.7E4" uncertaintyType="0"></exchange>
			<exchange number="97" category="resource" subCategory="in ground" infrastructureProcess="false" name="Silver, 3.2ppm in sulfide, Ag 1.2ppm, Cu and Te, in crude ore, in ground" location="" unit="kg" meanValue="1.7" uncertaintyType="0"></exchange>
			<exchange number="98" category="resource" subCategory="in ground" infrastructureProcess="false" name="Silver, Ag 2.1E-4%, Au 2.1E-4%, in ore, in ground" location="" unit="kg" meanValue="4.05E3" uncertaintyType="0"></exchange>
			<exchange number="99" category="resource" subCategory="in ground" infrastructureProcess="false" name="Silver, Ag 4.2E-3%, Au 1.1E-4%, in ore, in ground" location="" unit="kg" meanValue="5.22E4" uncertaintyType="0"></exchange>
			<exchange number="100" category="resource" subCategory="in ground" infrastructureProcess="false" name="Silver, Ag 4.6E-5%, Au 1.3E-4%, in ore, in ground" location="" unit="kg" meanValue="1.28E6" uncertaintyType="0"></exchange>
			<exchange number="101" category="resource" subCategory="in ground" infrastructureProcess="false" name="Silver, Ag 9.7E-4%, Au 9.7E-4%, Zn 0.63%, Cu 0.38%, Pb 0.014%, in ore, in ground" location="" unit="kg" meanValue="219" uncertaintyType="0"></exchange>
			<exchange number="102" category="resource" subCategory="in ground" infrastructureProcess="false" name="Sodium chloride, in ground" location="" unit="kg" meanValue="1" uncertaintyType="0"></exchange>
			<exchange number="103" category="resource" subCategory="in ground" infrastructureProcess="false" name="Sodium nitrate, in ground" location="" unit="kg" meanValue="1" uncertaintyType="0"></exchange>
			<exchange number="104" category="resource" subCategory="in ground" infrastructureProcess="false" name="Sodium sulphate, various forms, in ground" location="" unit="kg" meanValue="1" uncertaintyType="0"></exchange>
			<exchange number="105" category="resource" subCategory="in ground" infrastructureProcess="false" name="Spodumene, in ground" location="" unit="kg" meanValue="1" uncertaintyType="0"></exchange>
			<exchange number="106" category="resource" subCategory="in ground" infrastructureProcess="false" name="Stibnite, in ground" location="" unit="kg" meanValue="1" uncertaintyType="0"></exchange>
			<exchange number="107" category="resource" subCategory="in ground" infrastructureProcess="false" name="Sulfur, in ground" location="" unit="kg" meanValue="1" uncertaintyType="0"></exchange>
			<exchange number="108" category="resource" subCategory="in ground" infrastructureProcess="false" name="Sylvite, 25 % in sylvinite, in ground" location="" unit="kg" meanValue="4" uncertaintyType="0"></exchange>
			<exchange number="109" category="resource" subCategory="in ground" infrastructureProcess="false" name="Talc, in ground" location="" unit="kg" meanValue="1.1" uncertaintyType="0"></exchange>
			<exchange number="110" category="resource" subCategory="in ground" infrastructureProcess="false" name="Tantalum, 81.9% in tantalite, 1.6E-4% in crude ore, in ground" location="" unit="kg" meanValue="1" uncertaintyType="0"></exchange>
			<exchange number="111" category="resource" subCategory="in ground" infrastructureProcess="false" name="Tellurium, 0.5ppm in sulfide, Te 0.2ppm, Cu and Ag, in crude ore, in ground" location="" unit="kg" meanValue="1" uncertaintyType="0"></exchange>
			<exchange number="112" category="resource" subCategory="in ground" infrastructureProcess="false" name="Tin, 79% in cassiterite, 0.1% in crude ore, in ground" location="" unit="kg" meanValue="1.21E3" uncertaintyType="0"></exchange>
			<exchange number="113" category="resource" subCategory="in ground" infrastructureProcess="false" name="TiO2, 54% in ilmenite, 2.6% in crude ore, in ground" location="" unit="kg" meanValue="46.5" uncertaintyType="0"></exchange>
			<exchange number="114" category="resource" subCategory="in ground" infrastructureProcess="false" name="TiO2, 95% in rutile, 0.40% in crude ore, in ground" location="" unit="kg" meanValue="302" uncertaintyType="0"></exchange>
			<exchange number="115" category="resource" subCategory="in ground" infrastructureProcess="false" name="Ulexite, in ground" location="" unit="kg" meanValue="1" uncertaintyType="0"></exchange>
			<exchange number="116" category="resource" subCategory="in ground" infrastructureProcess="false" name="Uranium, in ground" location="" unit="kg" meanValue="1.7E4" uncertaintyType="0"></exchange>
			<exchange number="117" category="resource" subCategory="in ground" infrastructureProcess="false" name="Vermiculite, in ground" location="" unit="kg" meanValue="1" uncertaintyType="0"></exchange>
			<exchange number="118" category="resource" subCategory="in ground" infrastructureProcess="false" name="Zinc, 9.0% in sulfide, Zn 5.3%, Pb, Ag, Cd, In, in ground" location="" unit="kg" meanValue="1.21" uncertaintyType="0"></exchange>
			<exchange number="119" category="resource" subCategory="in ground" infrastructureProcess="false" name="Zinc, Zn 0.63%, Au 9.7E-4%, Ag 9.7E-4%, Cu 0.38%, Pb 0.014%, in ore, in ground" location="" unit="kg" meanValue="118" uncertaintyType="0"></exchange>
			<exchange number="120" category="resource" subCategory="in ground" infrastructureProcess="false" name="Zirconia, as baddeleyite, in ground" location="" unit="kg" meanValue="1" uncertaintyType="0"></exchange>
			<exchange number="121" category="resource" subCategory="in ground" infrastructureProcess="false" name="Zirconium, 50% in zircon, 0.39% in crude ore, in ground" location="" unit="kg" meanValue="256" uncertaintyType="0"></exchange>
		</flowData>
	</dataset>
</ecoSpold>
