# Supplementary material
Source: MDPI journal article supplement (https://www.mdpi.com/2079-9276/2/4/581)
Supplement: s1 [file s1 › SuppMat_S5.txt]

input/output	category	subcategory	process or elementary flow full name	ecoinvent DSID code	infrastructure process	country code of dataset	2005	2010	2015	2020	2025	2030	2035	2040	2045	2050	unit
o	electricity	supply mix	electricity mix/ DE/ kWh	706	0	DE	1	1	1	1	1	1	1	1	1	1	kWh
i	nuclear power	power plants	electricity, nuclear, at power plant/ DE/ kWh	1455	0	DE	0.258916324	0.193375459	0.127834594	0.062293729	0.031146865	0	0	0	0	0	kWh
i	hard coal	power plants	electricity, hard coal, at power plant/ DE/ kWh	862	0	DE	0.219478738	0.234740501	0.250002264	0.265264026	0.212113806	0.158963585	0.106783853	0.05460412	0.02730206	0	kWh
i	lignite	power plants	electricity, lignite, at power plant/ DE/ kWh	1016	0	DE	0.260631001	0.232816157	0.205001313	0.177186469	0.146483057	0.115779645	0.086432885	0.057086126	0.028543063	0	kWh
i	natural gas	power plants	electricity, natural gas, at power plant/ DE/ kWh	1384	0	DE	0.114883402	0.110486074	0.106088747	0.101691419	0.105584272	0.109477124	0.089734839	0.069992554	0.049193808	0.028395062	kWh
i	oil	power plants	electricity, oil, at power plant/ DE/ kWh	1620	0	DE	0.031035665	0.020690444	0.010345222	0	0	0	0	0	0	0	kWh
i	hydro power	power plants	electricity, hydropower, at pumped storage power plant/ DE/ kWh	963	0	DE	0.012174211	0.019116663	0.026059115	0.033001567	0.045780664	0.058559761	0.077532352	0.096504943	0.123400561	0.150296179	kWh
i	hydro power	power plants	electricity, hydropower, at power plant/ DE/ kWh	939	0	DE	0.033607682	0.039323646	0.04503961	0.050755575	0.054897667	0.059039759	0.061949725	0.064859691	0.066500643	0.068141595	kWh
i	wind power	power plants	electricity, at wind power plant/ RER/ kWh	2293	0	RER	0.046639232	0.068341425	0.090043619	0.111745812	0.125592621	0.13943943	0.153017342	0.166595253	0.175206351	0.183817448	kWh
i	wind power	power plants	electricity, at wind power plant 2MW, offshore/ OCE/ kWh	2295	0	OCE	0	0.023463139	0.046926279	0.070389418	0.136114296	0.201839175	0.261761159	0.321683142	0.356473892	0.391264642	kWh
i	photovoltaic	power plants	electricity, production mix photovoltaic, at plant/ DE/ kWh	6882	0	DE	0.002057613	0.012163394	0.022269174	0.032374955	0.04246737	0.052559785	0.059363565	0.066167346	0.071138555	0.076109765	kWh
i	biomass	cogeneration	electricity, at cogen with biogas engine, allocation exergy/ CH/ kWh	6221	0	CH	0.009493795	0.020985829	0.032477864	0.043969898	0.046056505	0.048143112	0.047719799	0.047296487	0.047173866	0.047051246	kWh
i	wood energy	cogeneration	electricity, at cogen ORC 1400kWth, wood, allocation exergy/ CH/ kWh	2326	0	CH	0.011082337	0.024497269	0.0379122	0.051327131	0.053762878	0.056198625	0.055704482	0.055210339	0.055067201	0.054924063	kWh
